# Supplementary material for: Safety and efficacy of inpatient pulmonary rehabilitation for patients hospitalised with an acute exacerbation of chronic obstructive pulmonary disease: a systematic review protocol
Source: HighWire-hosted journal article supplement (doi:10.1136/bmjopen-2020-043377), 2021-06-01
Supplement: bmjopen-2020-043377supp001_data_supplement.pdf [file bmjopen-2020-043377supp001_data_supplement.pdf]

**Appendix 1. Database search strategies****Database: MEDLINE® ALL <Inception to June, 2020>****Platform: Ovid SP**

| Search Line | Search Item                                                                                                                                                                                                                                                                       |
|-------------|-----------------------------------------------------------------------------------------------------------------------------------------------------------------------------------------------------------------------------------------------------------------------------------|
| 1           | exp pulmonary disease, chronic obstructive/                                                                                                                                                                                                                                       |
| 2           | exp lung diseases, obstructive/                                                                                                                                                                                                                                                   |
| 3           | (COPD or COAD or AECOPD or COBD or AECB or (acute exacerbation adj2 (COPD or chronic obstructive pulmonary disease))).mp                                                                                                                                                          |
| 4           | ((chronic or obstruct*) adj3 (airflow or airway* or bronch* or lung* or pulmonary or respirat*)).mp                                                                                                                                                                               |
| 5           | (emphysema or lung hyperinflation or hyperlucent lung or enlarged alveolar spaces).mp                                                                                                                                                                                             |
| 6           | 1 or 2 or 3 or 4 or 5                                                                                                                                                                                                                                                             |
| 7           | exp hospitalization/                                                                                                                                                                                                                                                              |
| 8           | exp inpatients/                                                                                                                                                                                                                                                                   |
| 9           | ((transitional care or step down or subacute or acute care or medical acute or critical care) adj3 (center* or centre* or unit* or floor* or ward* or clinic*)) or (hospital* or intensive care or ICU or inpatient* or in-patient* or patient* or emergency department*).mp      |
| 10          | 7 or 8 or 9                                                                                                                                                                                                                                                                       |
| 11          | exp exercise therapy/                                                                                                                                                                                                                                                             |
| 12          | exp exercise/                                                                                                                                                                                                                                                                     |
| 13          | exp exercise test/                                                                                                                                                                                                                                                                |
| 14          | exp exercise movement techniques/                                                                                                                                                                                                                                                 |
| 15          | exp exercise tolerance/                                                                                                                                                                                                                                                           |
| 16          | exp physical therapy speciality/                                                                                                                                                                                                                                                  |
| 17          | (exercise* or physical exercise* or exercise therap* or exercise test* or mobil* or walk* or resistance training or physical activit* or exercise-based intervention* or exercise program* or exercise rehabilitation or physical rehabilitation or ambulat* or gait training).mp |
| 18          | (pulmonary rehabil* or rehabil*).mp                                                                                                                                                                                                                                               |
| 19          | (frailty or activit* of daily living or ADL or muscle weakness or muscle strength or functional exercise capacity or functional mobility).mp                                                                                                                                      |
| 20          | 11 or 12 or 13 or 14 or 15 or 16 or 17 or 18 or 19                                                                                                                                                                                                                                |
| 21          | 6 and 10 and 20                                                                                                                                                                                                                                                                   |
